# Supplementary material for: Characterizing the nature and variability of avalanche hazard in western Canada
Source: Copernicus journal article supplement (doi:10.5194/nhess-18-1141-2018), 2018-04-12
Supplement: Supplementary file 1 [file nhess-18-1141-2018-supplement.zip]

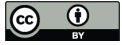

## *Supplement of*

# **Characterizing the nature and variability of avalanche hazard in western Canada**

**Bret Shandro and Pascal Haegeli**

*Correspondence to:* Bret Shandro (bshandro@sfu.ca)

- nhess-18-1141-2018-supplement-title-page.pdf
- S01.png
- S02.png
- S03.png
- S04.png
- supplement\_tables.docx

The copyright of individual parts of the supplement might differ from the CC BY 4.0 License.
